# Supplementary material for: Re‐arrest immediately after return of spontaneous circulation: A retrospective observational study of in‐hospital cardiac arrest
Source: PubMed Central journal article supplement — Acta Anaesthesiol Scand. 2024 Dec 18;69(1):e14567. doi: 10.1111/aas.14567 (PMC11653231; doi:10.1111/aas.14567), 2024-12-18
Supplement: AAS-69-0-s001.pdf [file AAS-69-0-s001.pdf]

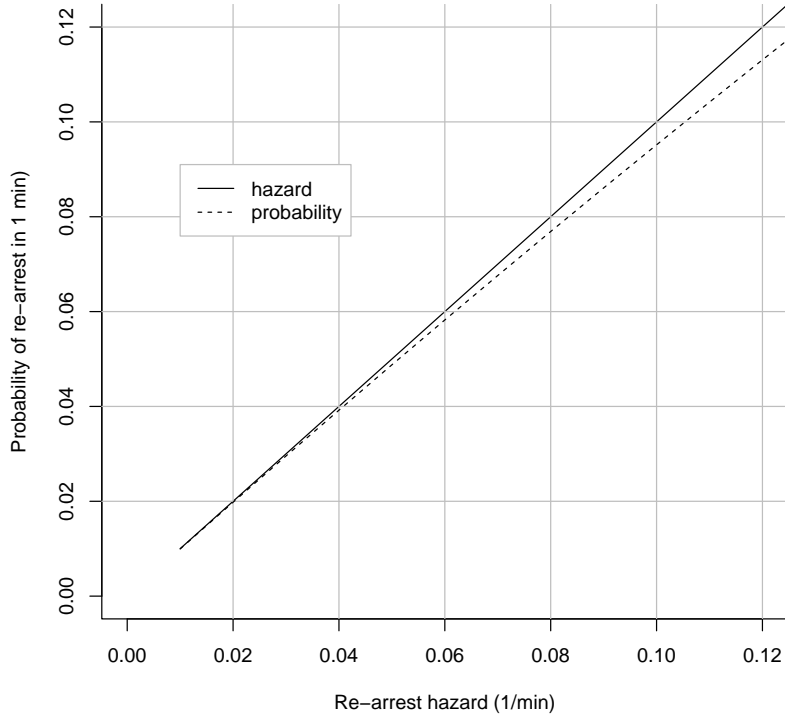

As illustrated in the figure above, we describe the approximation to the short-term probability of a specific event. Let  $T$  be the time until event and  $C = j, j = 1, 2, \dots, k$ , be the type of event (here, the time is time until recurrence of cardiac arrest, and the type of event is the clinical arrest state the patient returns to). Let  $h_j$  be the corresponding specific hazard rate for this event in a multi-state model. The event  $j$  specific hazard rate (often called cause-specific hazard rate) function is given as

$$h_j(t) = \lim_{\Delta t \rightarrow 0} \frac{P(t < T < t + \Delta t \cap C = j | T > t)}{\Delta t}$$

or approximately

$$h_j(t)\Delta t \approx P(t < T < t + \Delta t \cap C = j | T > t)$$

If the time scale is such that one time unit is "small", then we further get:

$$h_j(t) \approx P(t < T < t + 1 \cap C = j | T > t)$$

So roughly, the hazard for event  $C = j$  at time  $t$  is approximately equal to the probability that event  $j$  happens the next time unit, given that no event has happened up to time  $t$ . This is an acceptable approximation if all competing events have small probabilities of happening during one time unit.

### Assuming constant hazards

If one, as in a time-homogeneous Markov process, can assume constant hazard rates  $\lambda_i$  for all the competing risks  $i$ , we can illustrate this further. Let  $T_i$  be the time until event  $i$ , and let  $T = \min(T_1, T_2, \dots, T_k)$ . Due to the constant hazard assumption  $T_i$  will have an exponential distribution with rate  $\lambda$ . Then:

$$\begin{aligned}
P(t < T_j < t + \Delta t | T > t) &= \frac{P(t < T_j < t + \Delta t \cap T_i > T_j \forall i \neq j)}{P(T > t)} \\
&\stackrel{\text{indep.}}{\approx} \frac{[F_j(t + \Delta t) - F_j(t)] \cdot \prod_{i \neq j} [1 - F_i(t + \Delta t)]}{1 - F(t)} \\
&= \frac{[(1 - e^{-\lambda_j(t + \Delta t)}) - (1 - e^{-\lambda_j t})] \cdot \prod_{i \neq j} e^{-\lambda_i(t + \Delta t)}}{e^{-\sum_i \lambda_i t}} \\
&= \frac{[e^{-\lambda_j t} - e^{-\lambda_j(t + \Delta t)}] \cdot e^{-\sum_{i \neq j} \lambda_i t - \sum_{i \neq j} \lambda_i \Delta t}}{e^{-\sum_i \lambda_i t}} \\
&= (1 - e^{-\lambda_j \Delta t}) \cdot e^{-\sum_{i \neq j} \lambda_i \Delta t} \\
&\stackrel{\text{Taylor expansion}}{\approx} \lambda_j \Delta t \cdot (1 - \sum_{i \neq j} \lambda_i \Delta t) + \mathcal{O}((\lambda_j \Delta t)^2) + \mathcal{O}((\sum_{i \neq j} \lambda_i \Delta t)^2) \\
&\approx \lambda_j \Delta t
\end{aligned}$$

The Taylor expansion (using only the first term) becomes more precise the smaller the  $\lambda \Delta t$  - terms are. If  $\lambda_j \Delta t < 0.1$  and  $\sum_{i \neq j} \lambda_i \Delta t < 0.1$ , the error term will be of the order of 0.01, and so on (error  $\sim$  term<sup>2</sup>). E.g., for combinations of  $\lambda$ 's and  $\Delta t$  such that  $\lambda_j \Delta t < 0.1$  and  $\sum_{i \neq j} \lambda_i \Delta t < 0.1$  the approximation

$$h_j(t) \Delta t \approx P(t < T_j < t + \Delta t | T > t)$$

is OK. So, if the time scale is chosen such that  $\lambda_j \Delta t < 0.1$  and  $\sum_{i \neq j} \lambda_i \Delta t$  are both small (e.g.  $< 0.1$ ) even when  $\Delta t=1$ , we get

$$\lambda_j = h_j(t) \approx P(t < T_j < t + 1 | T > t)$$
